# Supplementary material for: Ligand Binding Modulates the Structural Dynamics and Compactness of the Major Birch Pollen Allergen
Source: PubMed Central journal article supplement (PMC4269767; doi:10.1016/j.bpj.2014.10.062), 2014-12-16
Supplement: mmc1.pdf [file mmc1.pdf]

## **SUPPORTING MATERIAL**

### **Ligand Binding Modulates Structural Dynamics and Compactness of The Major Birch Pollen Allergen**

Sarina Grutsch, Julian E. Fuchs, Regina Freier, Stefan Kofler,  
Mariam Bibi, Claudia Asam, Michael Wallner, Fátima Ferreira,  
Hans Brandstetter, Klaus R. Liedl and Martin Tollinger

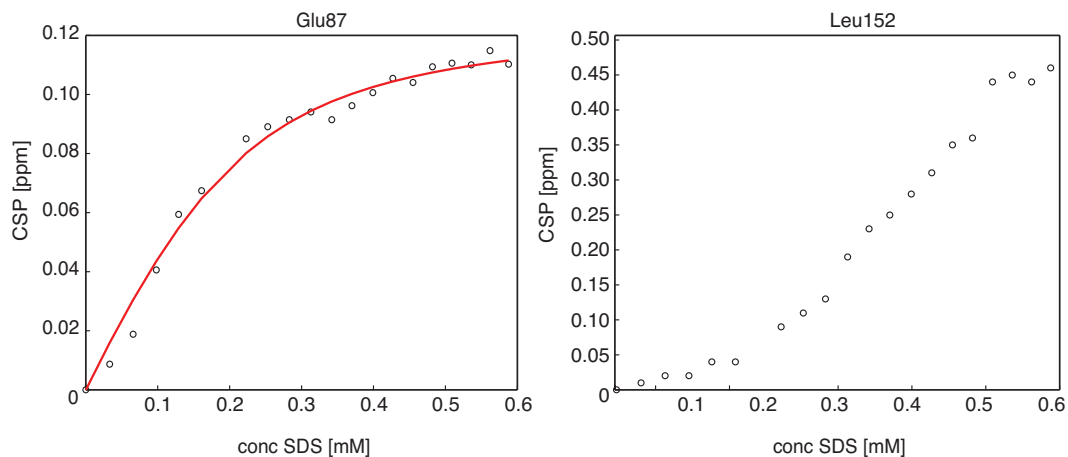

**Figure S1:** Representative titration curves derived from  $^1\text{H}$ - $^{15}\text{N}$  HSQC titrations. Left: Weighted chemical shift perturbation (in ppm) observed for the backbone amide resonance of Bet v 1.0101 residue Glu87 upon titration with sodium dodecyl sulfate (SDS)-titration vs. ligand concentration (between 0.03 mM and 0.6 mM, protein concentration: 0.2 mM). The dissociation constant was determined as  $K_d = 100 \mu\text{M}$ . Similar titration curves were observed for residues at the primary binding site (see Figure 1C), including Phe22, Arg70, Tyr83 and Ser117. Right: For some residues (e.g., Ala34, Gly140 and Leu152), significant chemical shift perturbations are only observed for protein:ligand ratios exceeding 1:1, indicating the presence of a second ligand binding site (Figure 1B).

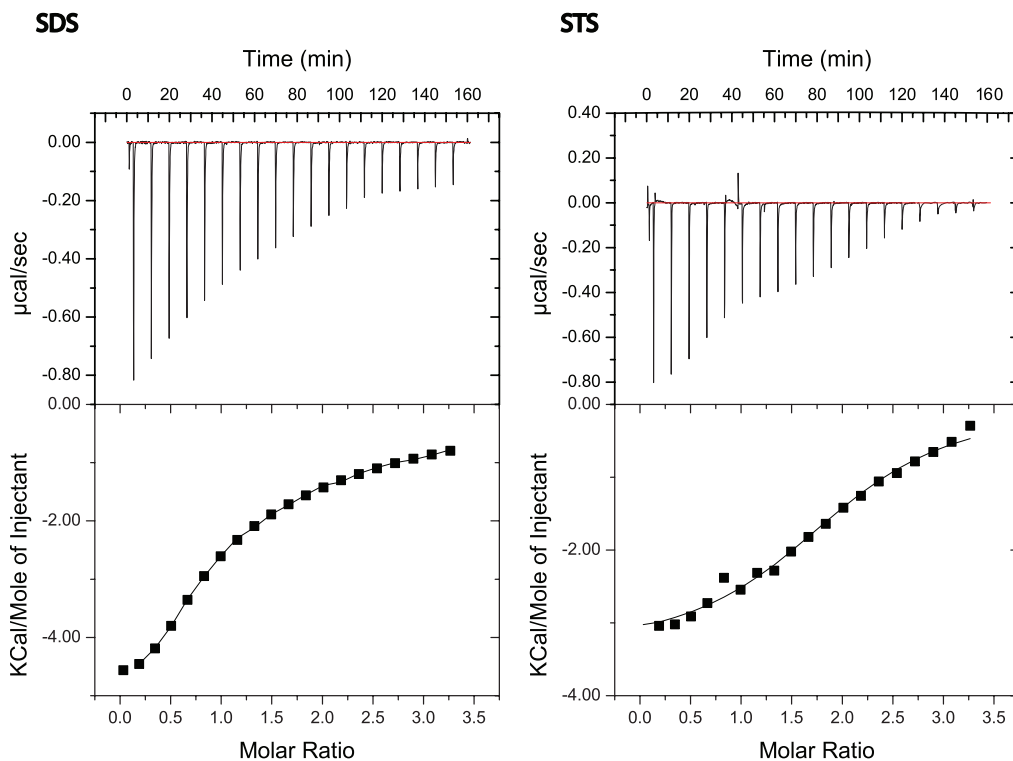

**Figure S2.** Representative isothermal titration calorimetric data of sodium dodecyl sulfate (SDS) and sodium tetradecyl sulfate (STS) binding to Bet v 1.0101. The heats of binding were measured in a thermogram with 20 injections (2  $\mu$ l) containing 1.5 mM SDS (right) / 1.5 mM STS (left) into a solution of 94  $\mu$ M Bet v 1.0101 at 298 K (top: raw thermogram data, bottom: cumulative heat release of reaction is displayed as a function of injection number (binding isotherm)). The stoichiometry and values of  $K_d$  are calculated (fitted using two-sites binding model) from these curves to 1  $\mu$ M (STS) and 7  $\mu$ M (SDS) for the first and 20  $\mu$ M (STS) and 100  $\mu$ M (SDS) for the second ligand.

**Table S1.** Radii of gyration ( $R_g$ ) and r.m.s.d. values of Bet v 1 structures

| <b>Ref.</b> |                                          | <b>PDB ID</b> | <b><math>R_g</math> [Å]</b> | <b>r.m.s.d. [Å]<br/>(to 1BV1)</b> |
|-------------|------------------------------------------|---------------|-----------------------------|-----------------------------------|
| (1)         | Bet v 1.0101                             | 4A88          | 15.47                       | 0.427                             |
| (1)         | Bet v 1.0101 (complex with DXC)          | 4A83          | 15.58                       | 0.497                             |
| (1)         | Bet v 1.0101 (complex with ANS)          | 4A80          | 15.58                       | 0.471                             |
| (1)         | Bet v 1.0101 (F30V, complex with DXC)    | 4A84          | 15.44                       | 0.430                             |
| (2)         | Bet v 1.0101 (M139L)                     | 1B6F          | 16.32 [a],[b]               | 1.558 [b]                         |
| (1)         | Bet v 1.0106                             | 4A8U          | 15.45                       | 0.477                             |
| (3)         | Bet v 1.0107                             | 1FM4          | 15.66                       | 0.591                             |
| (4)         | Bet v 1.0112                             | 1BV1          | 15.67                       | 0                                 |
| (4)         | Bet v 1.0112                             | 1BTV          | 15.50                       | 1.055                             |
| (5)         | Bet v 1.0112 (E45S)                      | 1LLT          | 15.63                       | 0.391                             |
| (6)         | Bet v 1.0112 (complex with IgG antibody) | 1FSK          | 15.50                       | 0.553                             |

[a] 1B6F with a partially unstructured C-terminus

[b]  $R_g$  and r.m.s.d. of first structure in the PDB entry

**Table S2.** X-ray data collection and model refinement.**Data collection**

|                      |                           |
|----------------------|---------------------------|
| Wavelength (Å)       | 0.9393                    |
| X-Ray source         | Synchrotron               |
| Resolution range (Å) | 37.83 - 1.78              |
| Space group          | P 1 21 1                  |
| Unit cell            | 32.7 55.6 37.9 90 93.7 90 |
| Total reflections    | 44009 (5793)              |
| Unique reflections   | 13028 (1853)              |
| Multiplicity         | 3.4 (3.1)                 |
| Completeness (%)     | 98.94 (95.60)             |
| Mean I/sigma(I)      | 8.1 (2.7)                 |
| Wilson B-factor      | 13.8                      |
| R-merge              | 0.082 (0.322)             |
| R-meas               | 0.097 (0.387)             |
| CC1/2                | 0.99 (0.88)               |
| CC*                  | 0.99 (0.97)               |

**Refinement statistics**

|                              |             |
|------------------------------|-------------|
| Resolution range (Å)         | 37.83 - 2.0 |
| R-work                       | 0.244       |
| R-free                       | 0.289       |
| Number of non-hydrogen atoms | 1326        |
| Ligands                      | 2           |
| Water                        | 54          |
| Protein residues             | 159         |
| R.M.S. (bonds)               | 0.004       |
| R.M.S. (angles)              | 0.804       |
| Average B-factor             | 19.6        |
| Ligands                      | 35.0        |
| Solvent                      | 17.8        |

## SUPPORTING REFERENCES

1. Kofler, S., C. Asam, U. Eckhard, M. Wallner, F. Ferreira, and H. Brandstetter. 2012. Crystallographically Mapped Ligand Binding Differs in High and Low IgE Binding Isoforms of Birch Pollen Allergen Bet v 1. *J Mol Biol* 422:109-123.
2. Schweimer, K., H. Sticht, J. Nerkamp, M. Boehm, M. Breitenbach, S. Vieths, and P. Rosch. 1999. NMR spectroscopy reveals common structural features of the birch pollen allergen Bet v 1 and the cherry allergen Pru a 1. *Appl Magn Reson* 17:449-464.
3. Markovic-Housley, Z., M. Degano, D. Lamba, E. von Roepenack-Lahaye, S. Clemens, M. Susani, F. Ferreira, O. Scheiner, and H. Breiteneder. 2003. Crystal structure of a hypoallergenic isoform of the major birch pollen allergen Bet v 1 and its likely biological function as a plant steroid carrier. *J Mol Biol* 325:123-133.
4. Gajhede, M., P. Osmark, F. M. Poulsen, H. Ipsen, J. N. Larsen, R. J. J. vanNeerven, C. Schou, H. Lowenstein, and M. D. Spangfort. 1996. X-ray and NMR structure of Bet v 1, the origin of birch pollen allergy. *Nat Struct Biol* 3:1040-1045.
5. Spangfort, M. D., O. Mirza, H. Ipsen, R. J. Van Neerven, M. Gajhede, and J. N. Larsen. 2003. Dominating IgE-binding epitope of Bet v 1, the major allergen of birch pollen, characterized by X-ray crystallography and site-directed mutagenesis. *Journal of immunology* 171:3084-3090.
6. Mirza, O., A. Henriksen, H. Ipsen, J. N. Larsen, M. Wissenbach, M. D. Spangfort, and M. Gajhede. 2000. Dominant epitopes and allergic cross-reactivity: complex formation between a Fab fragment of a monoclonal murine IgG antibody and the major allergen from birch pollen Bet v 1. *Journal of immunology* 165:331-338.
